# Supplementary material for: Investigation of the temperature-dependent behaviours of Li metal anode
Source: Royal Society of Chemistry journal article supplement (doi:10.1039/c9cc04897a), 2019-01-01
Supplement: c9cc04897a1.pdf [file c9cc04897a1.pdf]

## Supporting Information

### Contents

#### 1. Experimental Section

- Figure S1.** Low-magnified SEM images of Li nuclei in ether electrolytes at different temperatures. (a) 10 °C, (b) 25 °C, (c) 45 °C and (d) corresponding counted nucleation density.
- Figure S2.** SEM images of Li nucleates over Copper foil in ester electrolyte at (a-b) -20°C and (c-d) 45°C with different deposition capacity. Current density: 0.05 mA cm<sup>-2</sup>.
- Figure S3.** Typical AFM images of (a) pristine Cu electrode and Cu electrode after cycled at (b) 0 °C and (c) 60 °C. (d) AFM images of a locally magnified area as marked in (c).
- Figure S4.** Cyclic voltammograms of Li-Cu cells with initial 3 cycles between 0.01-3V in ether electrolyte at (a) 0 °C, (b) 10 °C, (c) 25 °C, (d) 45 °C and (e) 60 °C. Scan rate: 5 mV s<sup>-1</sup>.
- Table. S1.** The compositions and peak areas extracted from XPS spectra.
- Figure S5.** The voltage-time curves of Li-Li symmetric cells cycled in ether electrolyte at 25 °C and 60 °C using a current density of 1mA cm<sup>-2</sup> with capacity of 1mAh cm<sup>-2</sup>.
- Figure S6.** (a) Coulombic efficiency of Li-Cu cells cycled at low T and high T in ester electrolyte and (b-c) corresponding plating/stripping curves.
- Figure S7.** (a) Rate performances of Li-LiCoO<sub>2</sub> cells under both high and low T and corresponding charging-discharging curves at (b) 5°C and (c) 45 °C.

## Experimental Section

**Electrochemical Measurements.** Commercialized Cu foil was punched into disks of 14 mm in diameter and then washed by ethanol for three times to eliminate contamination followed by natural drying. CR2032-type Li-Cu half-cells, Li-Li symmetric cells and Li-LiCoO<sub>2</sub> cells (commercialized LiCoO<sub>2</sub>, Shenzhen Kejing Star Technology Co., LTD) were assembled inside an argon-filled glove box with 12.5 mm Li disks as both the reference and counter electrodes. 1 M LiPF<sub>6</sub> in EC/DMC/EMC (v:v:v=1:1:1) and 1 M LiTFSI in DOL/DME (v:v=1:1) with 1 wt% LiNO<sub>3</sub> were selected as electrolytes (Jiangsu Guotai Chaowei New Materials Co., Ltd.). Separator is PP-based celgard 2500. 60 $\mu$ L electrolyte is used per cell. Li plating/stripping measurements were performed using LAND battery testing system. The cells were initially stabilized at a current density of 50  $\mu$ A with a cut-off potential between 0.01V and 3V and then cycled at set current densities and capacities under different temperatures. Cyclic voltammetry (CV) studies were carried out at different temperatures using CHI760e electrochemical workstation. The electrochemical impedance spectroscopy (EIS) tests were conducted on Solartron Electrochemical Interface SI 1287 and SI 1260 from 0.01 to 100000 Hz with the amplitude of 5 mV.

**Materials Characterizations.** The morphology and chemical compositions were characterized using SEM (FEI Sirion 200) and XPS (Thermo Fisher ESCALab250 with monochromatic 150 W AlK $\alpha$  radiation).

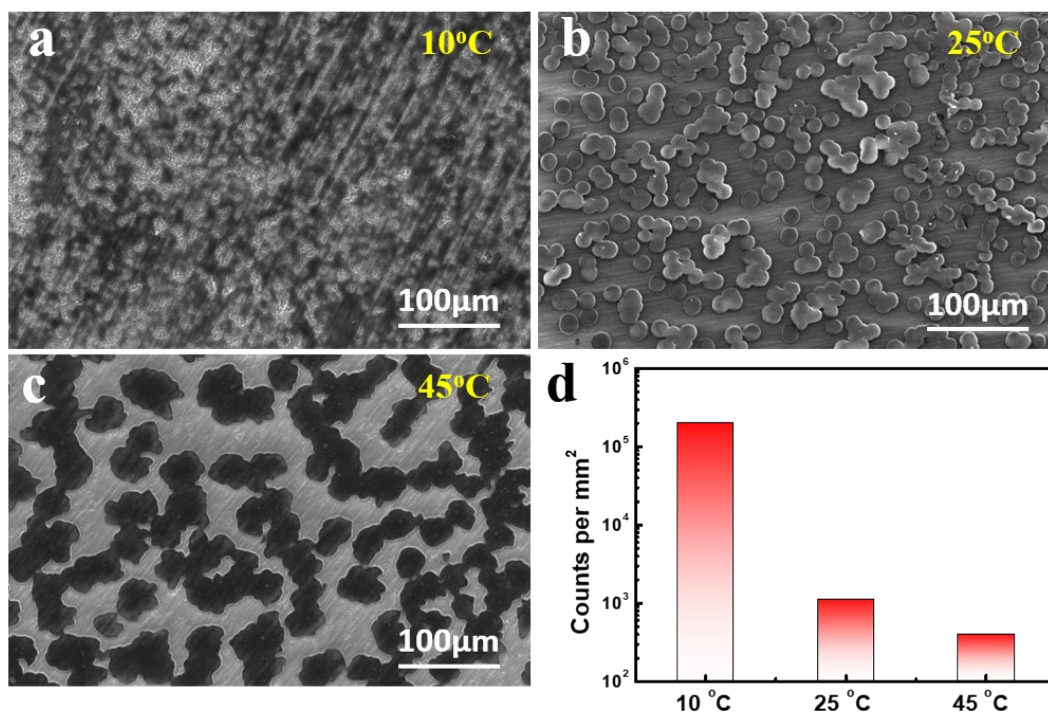

**Fig. S1.** Low-magnified SEM images of Li nuclei in ether electrolytes at different temperatures. (a) 10 °C, (b) 25 °C, (c) 45 °C and (d) corresponding counted nucleation density.

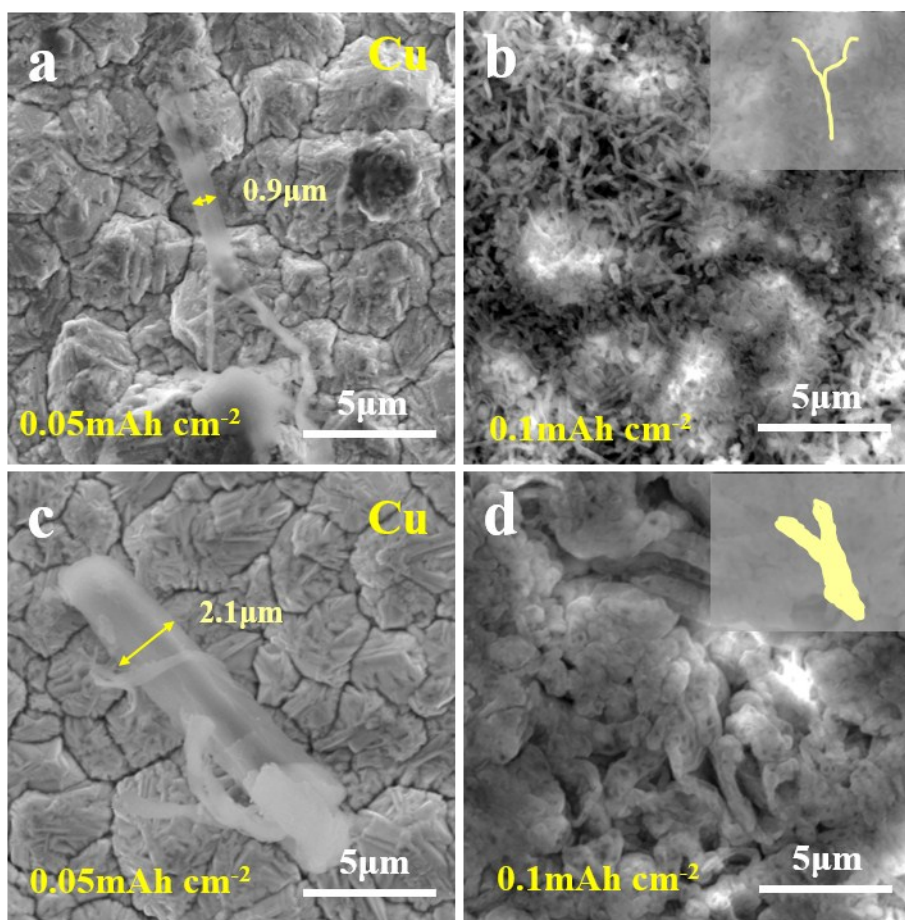

**Fig. S2.** SEM images of Li nucleates over Copper foil in ester electrolyte at (a-b) -20°C and (c-d) 45°C with different deposition capacity. Current density: 0.05 mA cm<sup>-2</sup>.

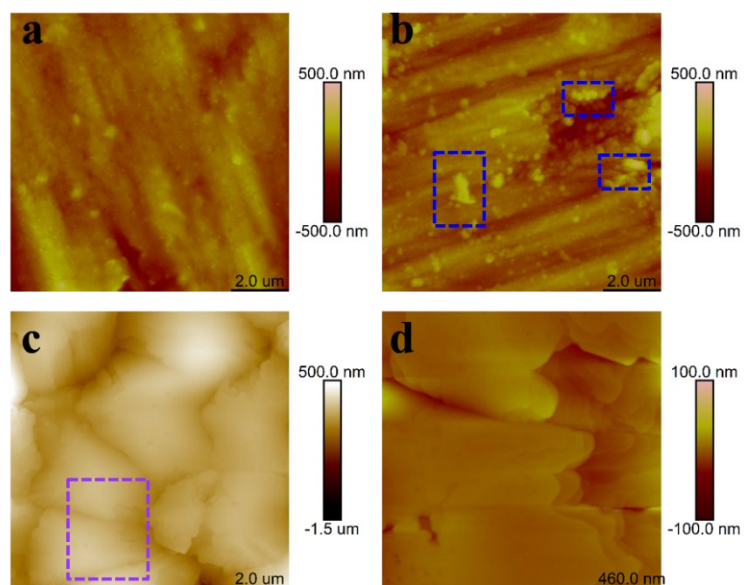

**Fig. S3.** Typical AFM images of (a) pristine Cu electrode and Cu electrode after cycled at (b) 0 °C and (c) 60 °C. (d) AFM images of a locally magnified area as marked in (c).

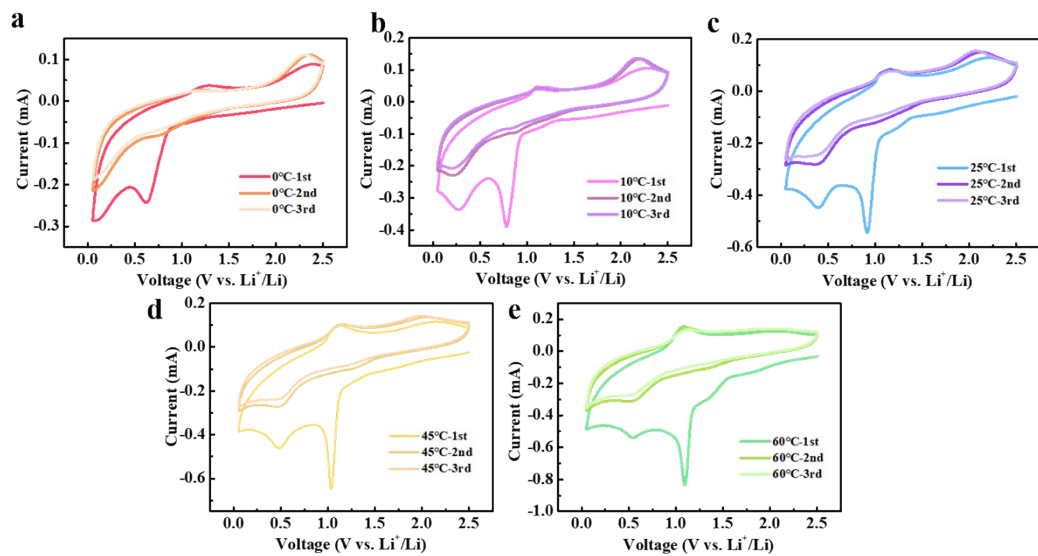

**Fig. S4** Cyclic voltammograms of Li-Cu cells with initial 3 cycles between 0.01-3V in ether electrolyte at (a) 0 °C, (b) 10 °C, (c) 25 °C, (d) 45 °C and (e) 60 °C. Scan rate: 5 mV s<sup>-1</sup>.

| Temperature | Spectra | Binding energy | Compositions                                  | Peak area |
|-------------|---------|----------------|-----------------------------------------------|-----------|
| 0°C         | N1s     | 404.23         | R-NO <sub>2</sub>                             | 56.93549  |
|             |         | 399.9          | Li <sub>3</sub> N                             | 481.4097  |
|             |         | 399.05         | LiN <sub>x</sub> O <sub>y</sub>               | 178.4166  |
| 60°C        | N1s     | 404.07         | R-NO <sub>2</sub>                             | 160.621   |
|             |         | 399.56         | Li <sub>3</sub> N                             | 509.9226  |
|             |         | 398.53         | LiN <sub>x</sub> O <sub>y</sub>               | 176.5701  |
| 0°C         | S2p     | 170.5          | Li <sub>2</sub> SO <sub>4</sub>               | 306.6817  |
|             |         | 169.45         | SO <sub>4</sub> <sup>2-</sup>                 | 666.9973  |
|             |         | 167.5          | Li <sub>2</sub> S <sub>2</sub> O <sub>4</sub> | 55.31921  |
| 60°C        | S2p     | 170.31         | Li <sub>2</sub> SO <sub>4</sub>               | 237.9653  |
|             |         | 169.2          | SO <sub>4</sub> <sup>2-</sup>                 | 509.8306  |
|             |         | 167.8          | Li <sub>2</sub> S <sub>2</sub> O <sub>4</sub> | 144.6707  |
| 0°C         | F1s     | 689.06         | Li <sub>x</sub> C <sub>2</sub> F <sub>y</sub> | 8508.244  |
|             |         | 684.9          | LiF                                           | 745.0798  |
| 60°C        | F1s     | 688.65         | Li <sub>x</sub> C <sub>2</sub> F <sub>y</sub> | 8907.233  |
|             |         | 684.85         | LiF                                           | 1352.6    |

**Table. S1** The compositions and peak areas extracted from XPS spectra.

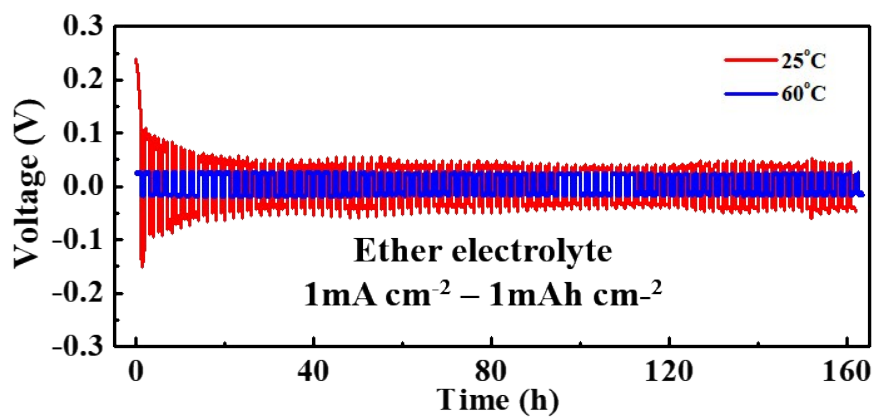

**Fig. S5.** The voltage-time curves of Li-Li symmetric cells cycled in ether electrolyte at 25 °C and 60 °C using a current density of  $1\text{mA cm}^{-2}$  with capacity of  $1\text{mAh cm}^{-2}$ .



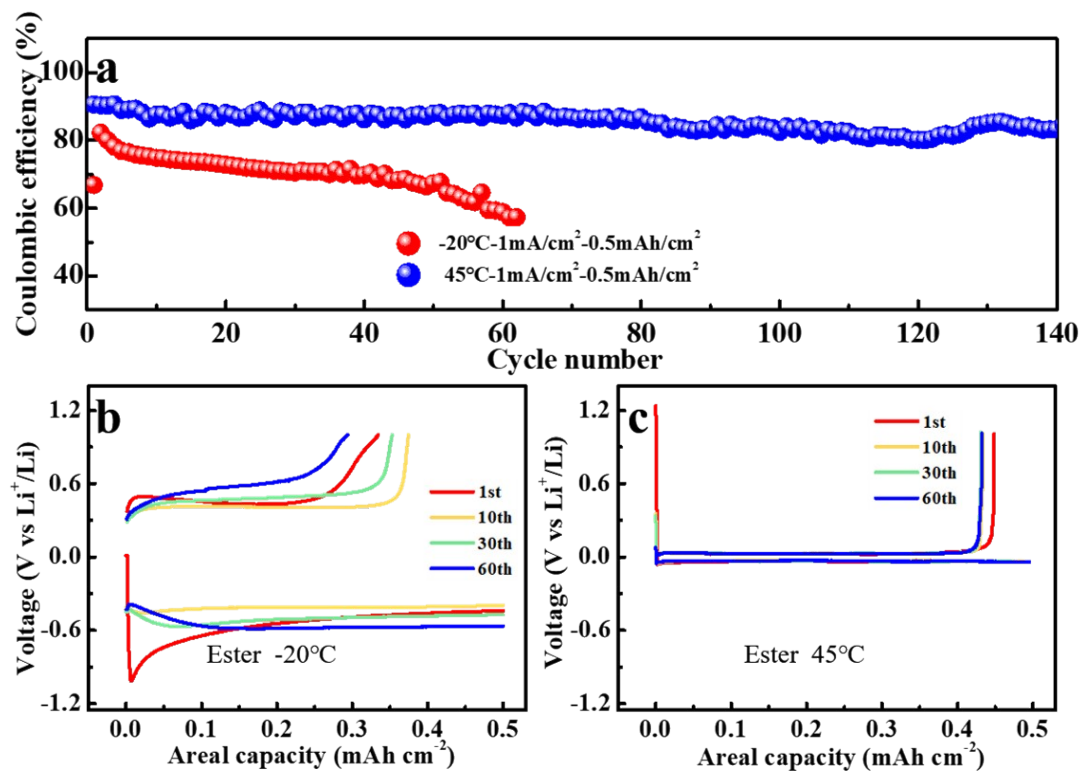

**Fig. S6.** (a) Coulombic efficiency of Li-Cu cells cycled at low T and high T in ester electrolyte and (b-c) corresponding plating/stripping curves.

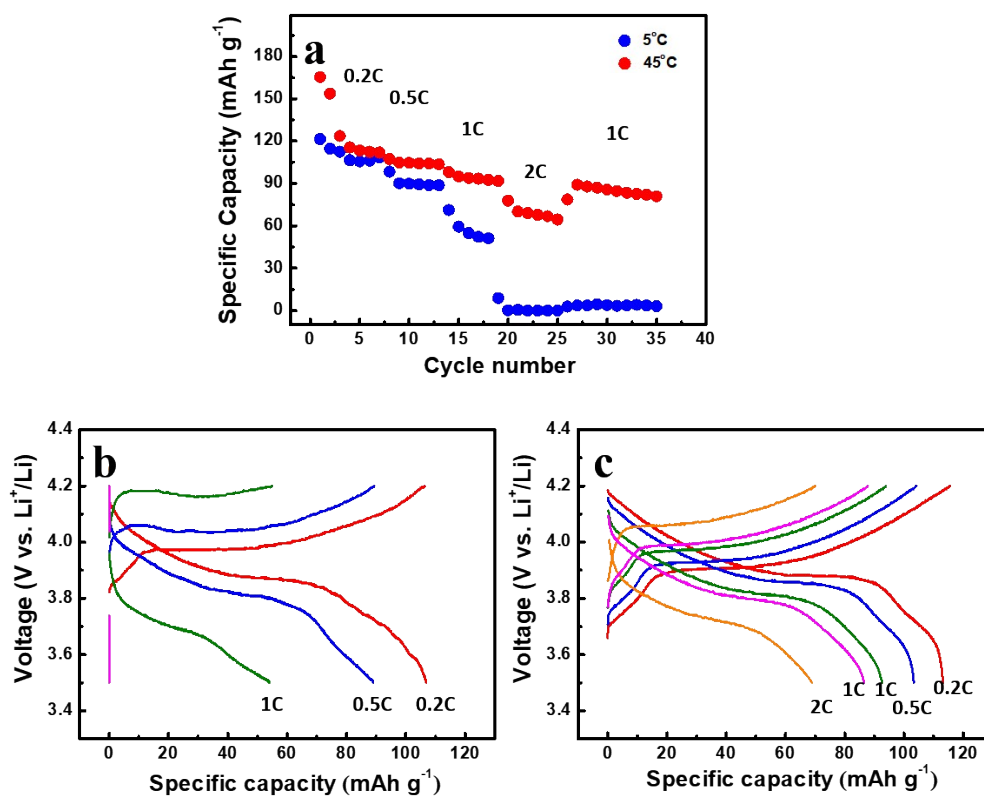

**Fig. S7.** (a) Rate performances of Li-LiCoO<sub>2</sub> cells under both high and low T and corresponding charging-discharging curves at (b) 5°C and (c) 45 °C.
